# Supplementary material for: A complementary organic inverter of porphyrazine thin films: low-voltage operation using ionic liquid gate dielectrics
Source: Royal Society of Chemistry journal article supplement (doi:10.1039/c0cc05198e), 2011-01-01
Supplement: c0cc05198e.pdf [file c0cc05198e.pdf]

# Supplementary Information

## **A Complementary Organic Inverter of Porphyrazine Thin Films: Low-Voltage Operation Using Ionic Liquid Gate Dielectrics**

Takuya Fujimoto,<sup>a</sup> Yasuhito Miyoshi,<sup>a</sup> Michio M. Matsushita<sup>a</sup> and  
Kunio Awaga\*<sup>a,b</sup>

<sup>a</sup> *Department of Chemistry & Research Center for Materials Science, Nagoya University, Chikusa-ku, Nagoya 464-8602, Japan. Fax: +81-52-789-2484; Tel: +81-789-2487; E-mail: [awaga@mbox.chem.nagoya-u.ac.jp](mailto:awaga@mbox.chem.nagoya-u.ac.jp)*

<sup>b</sup> *JST CREST*

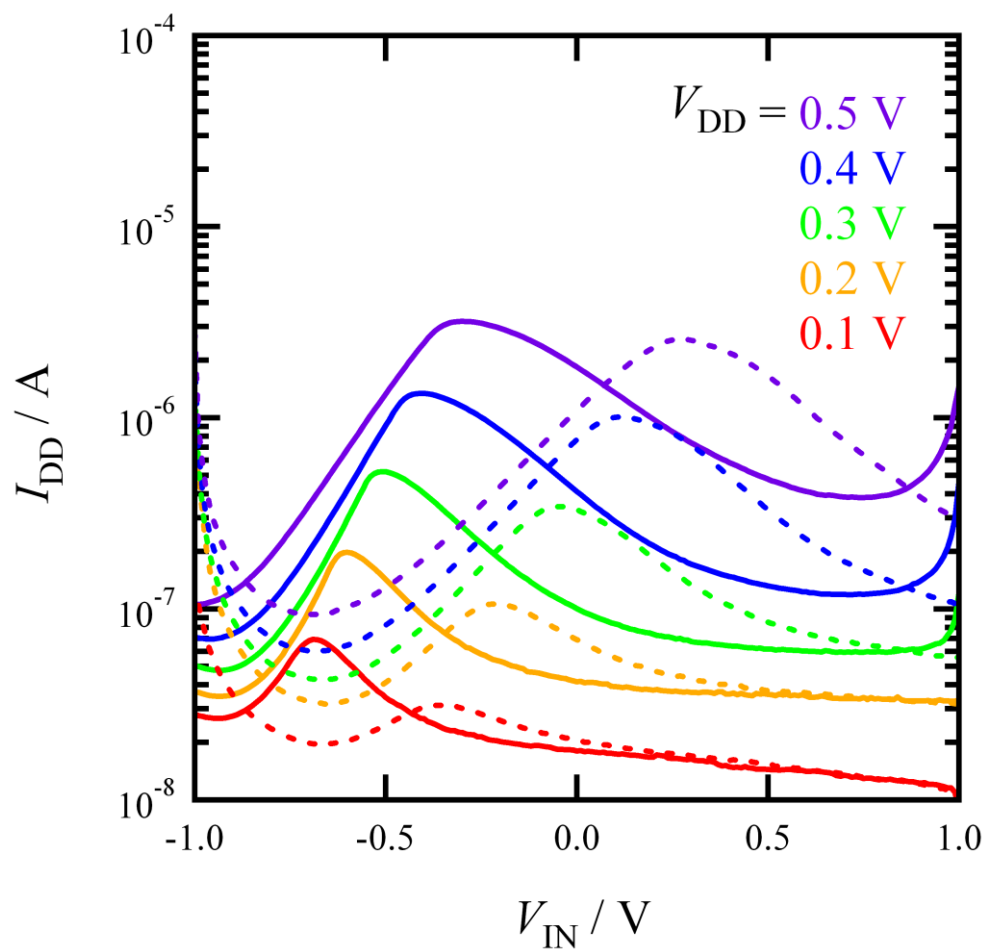

**Figure S1.**  $V_{IN}$  dependence of the leakage current  $I_{DD}$ .
